# Supplementary material for: MG53 permeates through blood-brain barrier to protect ischemic brain injury
Source: PubMed Central journal article supplement (PMC5008374; doi:10.18632/oncotarget.7965), 2016-03-08
Supplement: oncotarget-07-22474-s001.pdf [file oncotarget-07-22474-s001.pdf]

**SUPPLEMENTARY MOVIES**

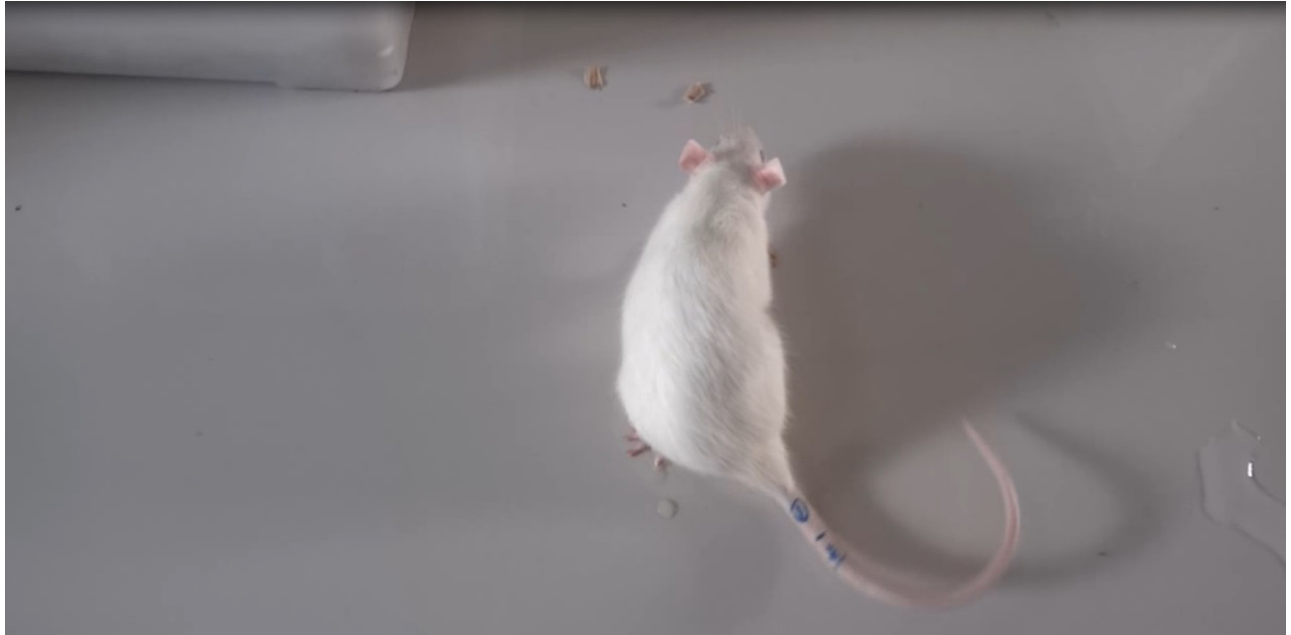

**Supplementary Movie S1**

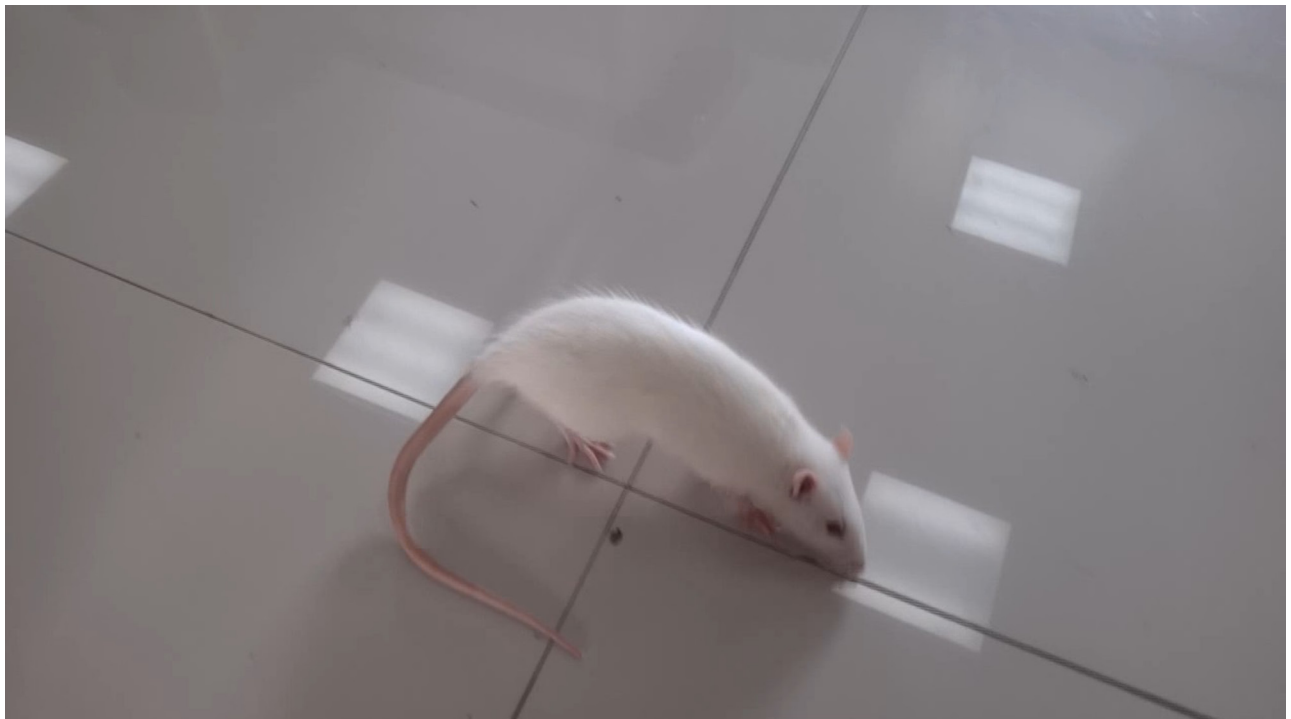

**Supplementary Movie S2**
